# Supplementary material for: A Simple Method for the Fabrication of Silicon Inverted Pyramid Substrates for Surface-Enhanced Raman Spectroscopy
Source: MDPI journal article supplement (doi:10.3390/ma16103634), 2023-05-10
Supplement: s1 [file s1]

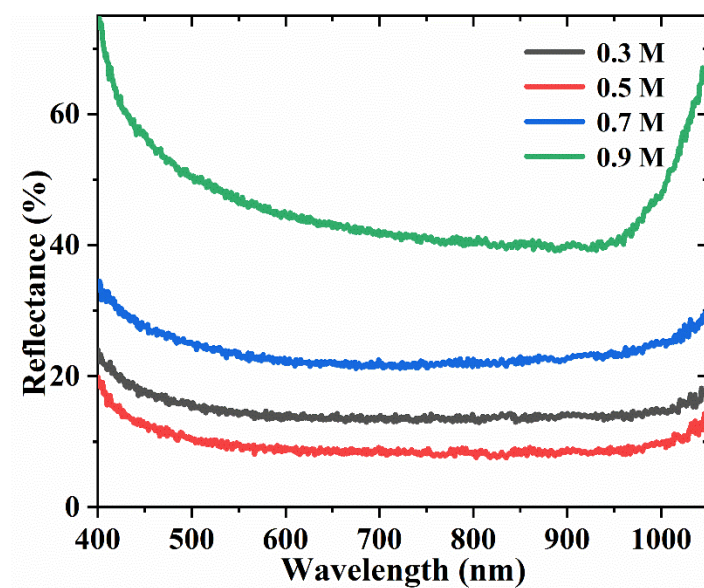

**Figure S1.** Reflectance spectra of silicon wafers etched in different  $\text{NH}_4\text{HF}_2$  solution for 7 min.

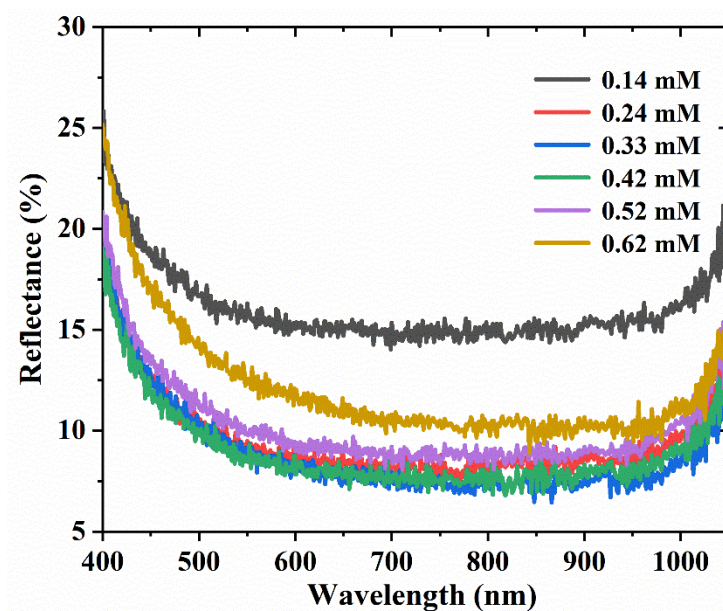

**Figure S2.** Reflectance spectra of silicon wafers etched in different  $\text{AgNO}_3$  solution for 7 min.

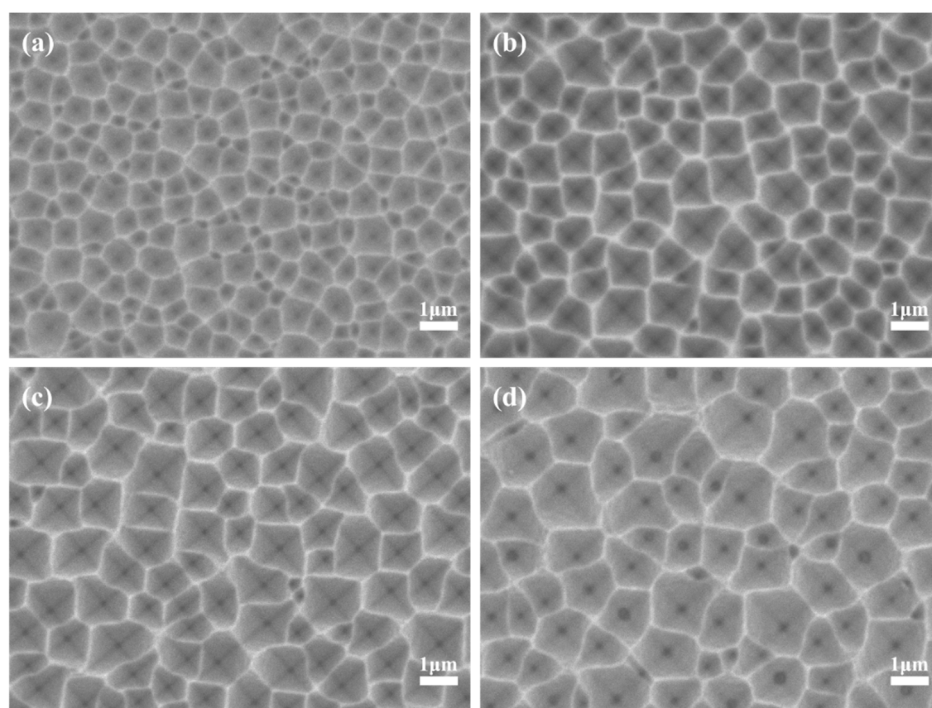

**Figure S3.** SEM images of silicon surface etched for different times (a) 3min; (b) 7min; (c) 11min; (d) 15min.

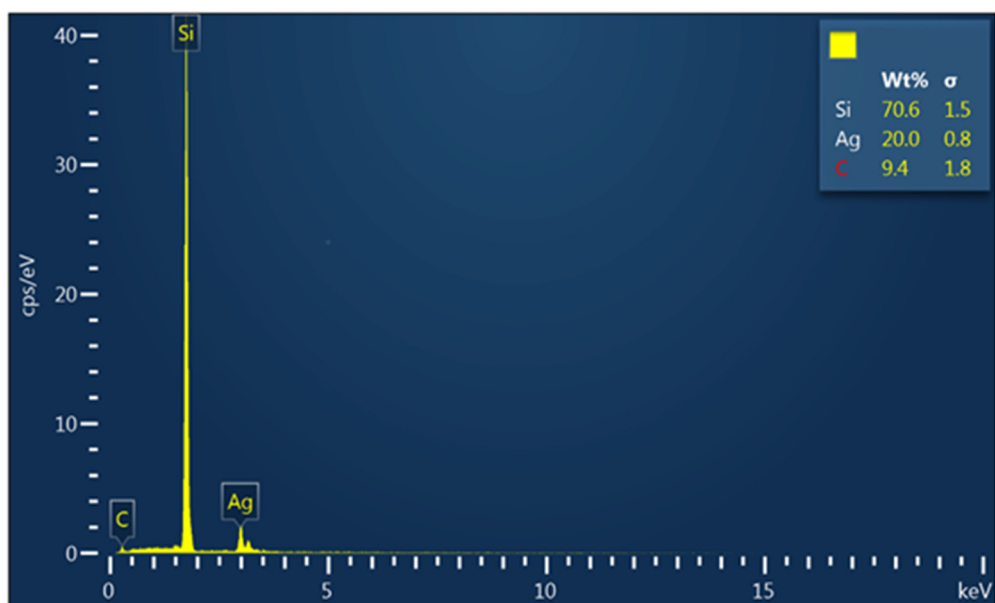

**Figure S4.** EDS spectrum of the substrate deposited with 240 s of Ag NPs

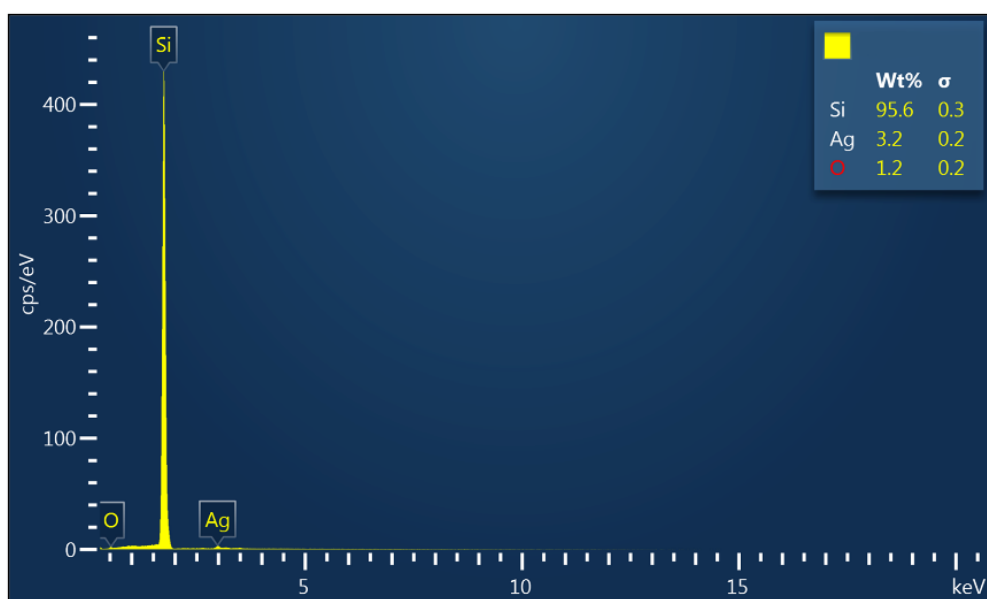

**Figure S5.** EDS spectrum of the substrate sputtered with 30 s of Ag NPs

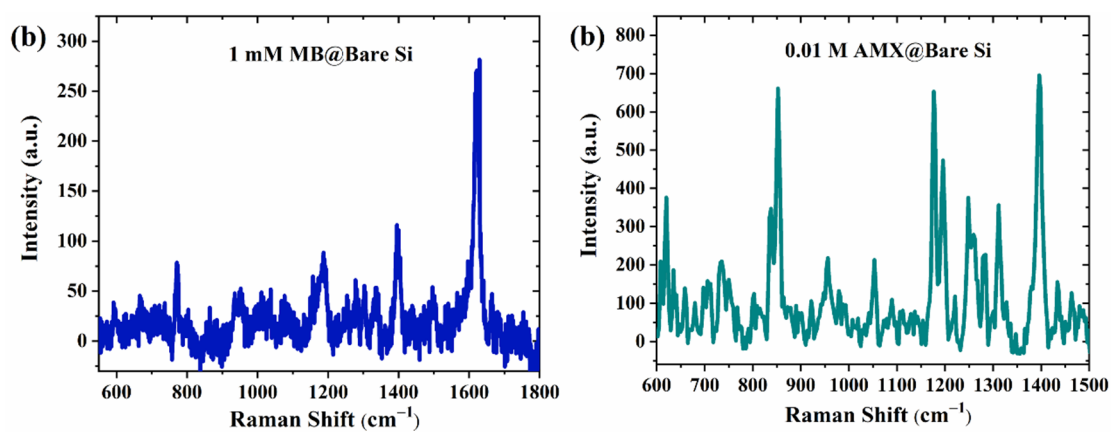

**Figure S6.** Real time Raman Spectra of MB (1 mM) and MP (0.01 M) were collected from Bare Si

**Table S1.** Assignment of vibration modes corresponding to each Raman peak for probe molecules methylene blue

| Raman peak ( $\text{cm}^{-1}$ ) | Band assignment                  |
|---------------------------------|----------------------------------|
| 595                             | Skeletal deformation of C-S-C    |
| 674                             | Out-of-plane bending of C-H      |
| 770, 951, 1039                  | In-plane bending of C-H          |
| 1181,                           | Stretching of C-N                |
| 1301                            | In-plane ring deformation of C-H |
| 1394                            | Symmetrical stretching of C-N    |
| 1622                            | Ring stretching of C-C           |

**Table S2.** Assignment of vibration modes corresponding to each Raman peak for probe molecules amoxicillin

| Raman peak ( $\text{cm}^{-1}$ ) | Band assignment                     |
|---------------------------------|-------------------------------------|
| 616                             | Bending of -OH                      |
| 667                             | Ring deformation of benzene         |
| 791                             | In-plane deformation                |
| 937                             | Amine bending                       |
| 1158                            | Benzene ring's C-H bending          |
| 1293                            | Benzene's in-plane deformation      |
| 1351                            | Amine's twisting                    |
| 1461                            | Asymmetric bending of $\text{CH}_3$ |
